# Supplementary material
Source: ML conference proceedings conference paper supplement (https://proceedings.mlr.press/v38/zhang15.html)
Supplement: Supplementary file [file zhang15-supp.pdf]

## Supplementary Material: A Simple Homotopy Algorithm for Compressive Sensing

Lijun Zhang\*

Tianbao Yang†

Rong Jin‡

Zhi-Hua Zhou\*

\*National Key Laboratory for Novel Software Technology, Nanjing University, Nanjing, China

†Department of Computer Science, the University of Iowa, Iowa City, USA

‡Department of Computer Science and Engineering, Michigan State University, East Lansing, USA

‡Institute of Data Science and Technologies at Alibaba Group, Seattle, USA

{zhanglj, zhouzh}@lamda.nju.edu.cn tianbao-yang@uiowa.edu rongjin@cse.msu.edu

### A Proof of Lemma 2

The analysis is the same as that for Lemma 9.2 of Koltchinskii (2011), we include it for completeness. For any  $\mathbf{x}, \mathbf{x}' \in \mathcal{K}_{d,s}$ , we can always find two vectors  $\mathbf{y}, \mathbf{y}'$  such that

$$\mathbf{x} - \mathbf{x}' = \mathbf{y} - \mathbf{y}', \quad \|\mathbf{y}\|_0 \leq s, \quad \|\mathbf{y}'\|_0 \leq s, \quad \mathbf{y}^\top \mathbf{y}' = 0.$$

Thus

$$\begin{aligned} \langle \mathbf{x} - \mathbf{x}', UU^\top \mathbf{z} \rangle &= \langle \mathbf{y}, UU^\top \mathbf{z} \rangle + \langle -\mathbf{y}', UU^\top \mathbf{z} \rangle \\ &= \|\mathbf{y}\|_2 \left\langle \frac{\mathbf{y}}{\|\mathbf{y}\|_2}, UU^\top \mathbf{z} \right\rangle + \|\mathbf{y}'\|_2 \left\langle \frac{-\mathbf{y}'}{\|\mathbf{y}'\|_2}, UU^\top \mathbf{z} \right\rangle \\ &\leq (\|\mathbf{y}\|_2 + \|\mathbf{y}'\|_2) \mathcal{E}_s(\mathbf{z}) \leq \mathcal{E}_s(\mathbf{z}) \sqrt{2} \sqrt{\|\mathbf{y}\|_2^2 + \|\mathbf{y}'\|_2^2} \\ &= \mathcal{E}_s(\mathbf{z}) \sqrt{2} \|\mathbf{y} - \mathbf{y}'\|_2 = \mathcal{E}_s(\mathbf{z}) \sqrt{2} \|\mathbf{x} - \mathbf{x}'\|_2. \end{aligned}$$

Then, we have

$$\begin{aligned} \mathcal{E}_s(\mathbf{z}) &= \max_{\mathbf{w} \in \mathcal{K}_{d,s}} \mathbf{w}^\top UU^\top \mathbf{z} \\ &\leq \mathcal{E}_s(\mathbf{z}, \epsilon) + \sup_{\mathbf{x} \in \mathcal{K}_{d,s}, \mathbf{x}' \in \mathcal{K}_{d,s}(\epsilon), \|\mathbf{x} - \mathbf{x}'\|_2 \leq \epsilon} \langle \mathbf{x} - \mathbf{x}', UU^\top \mathbf{z} \rangle \\ &\leq \mathcal{E}_s(\mathbf{z}, \epsilon) + \sqrt{2} \epsilon \mathcal{E}_s(\mathbf{z}) \end{aligned}$$

which implies

$$\mathcal{E}_s(\mathbf{z}) \leq \frac{\mathcal{E}_s(\mathbf{z}, \epsilon)}{1 - \sqrt{2}\epsilon}.$$

### B Proof of Lemma 3

Since

$$\begin{aligned} &|\mathbf{w}^\top UU^\top \mathbf{z} - \mathbf{w}^\top \mathbf{z}| \\ &= \|\mathbf{w}\|_2 \left| \frac{1}{\|\mathbf{w}\|_2} \mathbf{w}^\top UU^\top \mathbf{z} - \frac{1}{\|\mathbf{w}\|_2} \mathbf{w}^\top \mathbf{z} \right| \\ &\leq \left| \frac{1}{\|\mathbf{w}\|_2} \mathbf{w}^\top UU^\top \mathbf{z} - \frac{1}{\|\mathbf{w}\|_2} \mathbf{w}^\top \mathbf{z} \right|, \end{aligned}$$

without loss of generality, we can assume  $\|\mathbf{w}\|_2 = 1$ .

We decompose  $\mathbf{z}$  as  $\mathbf{z} = \mathbf{z}_\parallel + \mathbf{z}_\perp$ , where

$$\mathbf{z}_\parallel = (\mathbf{z}^\top \mathbf{w}) \mathbf{w}, \quad \mathbf{z}_\perp = \mathbf{z} - \mathbf{z}_\parallel.$$

As a result

$$\begin{aligned} \mathbf{w}^\top UU^\top \mathbf{z} &= \mathbf{w}^\top UU^\top \mathbf{z}_\parallel + \mathbf{w}^\top UU^\top \mathbf{z}_\perp \\ &= (\mathbf{z}^\top \mathbf{w}) \|U^\top \mathbf{w}\|_2^2 + \mathbf{w}^\top UU^\top \mathbf{z}_\perp. \end{aligned} \quad (5)$$

We first consider bounding  $\|U^\top \mathbf{w}\|_2^2$ . Notice that  $U = \frac{1}{\sqrt{m}}[\mathbf{u}_1, \dots, \mathbf{u}_m] \in \mathbb{R}^{d \times m}$ , and we assume  $\mathbf{u}_i$ 's are independent, isotropic, and sub-Gaussian vectors. Then, for any fixed vector  $\mathbf{x}$ , with a probability at least  $1 - e^{-C_1 m \epsilon^2}$ , we have (Mendelson et al., 2008, Section 3.1)

$$(1 - \epsilon) \|\mathbf{x}\|_2^2 \leq \|U^\top \mathbf{x}\|_2^2 \leq (1 + \epsilon) \|\mathbf{x}\|_2^2$$

where  $C_1 > 0$  is some constant. And thus, with a probability at least with a least  $1 - e^{-\tau}$ , we have

$$1 - C_1 \sqrt{\frac{\tau}{m}} \leq \|U^\top \mathbf{w}\|_2^2 \leq 1 + C_1 \sqrt{\frac{\tau}{m}} \quad (6)$$

for some constant  $C_1 > 0$ .

Next, we consider bounding  $\mathbf{w}^\top UU^\top \mathbf{z}_\perp = \frac{1}{m} \sum_{i=1}^m \mathbf{w}^\top \mathbf{u}_i \mathbf{u}_i^\top \mathbf{z}_\perp$ . Since  $\mathbf{u}_i$ 's are isotropic, we have

$$\mathbb{E}[\mathbf{w}^\top \mathbf{u}_i \mathbf{u}_i^\top \mathbf{z}_\perp] = \mathbf{w}^\top \mathbf{z}_\perp = 0.$$

Based on the property  $\|\eta_1 \eta_2\|_{\psi_1} \leq \|\eta_1\|_{\psi_2} \|\eta_2\|_{\psi_2}$  (Koltchinskii, 2009, Page 815), we know that  $\mathbf{w}^\top \mathbf{u}_i \mathbf{u}_i^\top \mathbf{z}_\perp$  is a sub-exponential random variable, and

$$\begin{aligned} \|\mathbf{w}^\top \mathbf{u}_i \mathbf{u}_i^\top \mathbf{z}_\perp\|_{\psi_1} &\leq \|\mathbf{u}_i^\top \mathbf{w}\|_{\psi_2} \|\mathbf{u}_i^\top \mathbf{z}_\perp\|_{\psi_2} \\ &\leq \|\mathbf{w}\|_2 \|\mathbf{z}_\perp\|_2 \leq \|\mathbf{z}\|_2. \end{aligned}$$

And thus  $\{\mathbf{w}^\top \mathbf{u}_i \mathbf{u}_i^\top \mathbf{z}_\perp\}_{i=1}^m$  is a set of independent centered sub-exponential random variables. Following the Bernstein-type inequality for sub-exponential random

variables (Vershynin, 2012, Proposition 5.16), with a probability at least  $1 - e^{-\tau}$ , we have

$$|\mathbf{w}^\top U U^\top \mathbf{z}_\perp| \leq C_2 \|\mathbf{z}\|_2 \sqrt{\frac{\tau}{m}} \quad (7)$$

for some constant  $C_2 > 0$ .

Putting everything together, with a probability at least  $1 - 2e^{-\tau}$ , we have

$$\begin{aligned} & |\mathbf{w}^\top U U^\top \mathbf{z} - \mathbf{w}^\top \mathbf{z}| \\ & \stackrel{(5)}{=} |(\mathbf{z}^\top \mathbf{w}) \|U^\top \mathbf{w}\|_2^2 + \mathbf{w}^\top U U^\top \mathbf{z}_\perp - \mathbf{w}^\top \mathbf{z}| \\ & \leq |\mathbf{w}^\top \mathbf{z}| \left| \|U^\top \mathbf{w}\|_2^2 - 1 \right| + |\mathbf{w}^\top U U^\top \mathbf{z}_\perp| \\ & \stackrel{(6), (7)}{\leq} C_1 \sqrt{\frac{\tau}{m}} |\mathbf{w}^\top \mathbf{z}| + C_2 \|\mathbf{z}\|_2 \sqrt{\frac{\tau}{m}} \\ & \leq (C_1 + C_2) \|\mathbf{z}\|_2 \sqrt{\frac{\tau}{m}}. \end{aligned}$$

## C Proof of Theorem 2

Let  $\mathcal{X}$  and  $\mathcal{Y}$  be the support set of  $\mathbf{x}$  and  $\mathbf{y}$ , respectively. If  $|\mathcal{X}| \leq s$ , we have

$$\|\mathbf{x}^s - \mathbf{y}\|_2 = \|\mathbf{x} - \mathbf{y}\|_2.$$

Thus, in the following, we only need to consider the case  $|\mathcal{X}| > s$ .

Let  $\mathcal{A}$  be the indices of the  $s$  largest elements in  $\mathbf{x}$ , and  $\mathcal{B} = \mathcal{X} \setminus \mathcal{A}$ . Then, we have

$$\begin{aligned} \|\mathbf{x} - \mathbf{y}\|_2^2 &= \sum_{i \in \mathcal{A} \setminus \mathcal{Y}} x_i^2 + \sum_{i \in \mathcal{A} \cap \mathcal{Y}} (x_i - y_i)^2 \\ &\quad + \sum_{i \in \mathcal{B} \cap \mathcal{Y}} (x_i - y_i)^2 + \sum_{i \in \mathcal{B} \setminus \mathcal{Y}} x_i^2, \\ \|\mathbf{x}^s - \mathbf{y}\|_2^2 &= \sum_{i \in \mathcal{A} \setminus \mathcal{Y}} x_i^2 + \sum_{i \in \mathcal{A} \cap \mathcal{Y}} (x_i - y_i)^2 + \sum_{i \in \mathcal{B} \cap \mathcal{Y}} y_i^2. \end{aligned}$$

Since

$$|\mathcal{A} \setminus \mathcal{Y}| + |\mathcal{A} \cap \mathcal{Y}| = |\mathcal{A}| = s \geq |\mathcal{Y}| = |\mathcal{A} \cap \mathcal{Y}| + |\mathcal{B} \cap \mathcal{Y}|$$

we have  $|\mathcal{A} \setminus \mathcal{Y}| \geq |\mathcal{B} \cap \mathcal{Y}|$ . As a result, we must have

$$\sum_{i \in \mathcal{B} \cap \mathcal{Y}} x_i^2 \leq \sum_{i \in \mathcal{A} \setminus \mathcal{Y}} x_i^2. \quad (8)$$

Since

$$\begin{aligned} \sum_{i \in \mathcal{B} \cap \mathcal{Y}} y_i^2 &\leq 2 \sum_{i \in \mathcal{B} \cap \mathcal{Y}} (x_i - y_i)^2 + 2 \sum_{i \in \mathcal{B} \cap \mathcal{Y}} x_i^2 \\ &\stackrel{(8)}{\leq} 2 \sum_{i \in \mathcal{B} \cap \mathcal{Y}} (x_i - y_i)^2 + 2 \sum_{i \in \mathcal{A} \setminus \mathcal{Y}} x_i^2, \end{aligned}$$

we have

$$\begin{aligned} & \|\mathbf{x}^s - \mathbf{y}\|_2^2 \\ & \leq 3 \sum_{i \in \mathcal{A} \setminus \mathcal{Y}} x_i^2 + \sum_{i \in \mathcal{A} \cap \mathcal{Y}} (x_i - y_i)^2 + 2 \sum_{i \in \mathcal{B} \cap \mathcal{Y}} (x_i - y_i)^2 \\ & \leq 3 \|\mathbf{x} - \mathbf{y}\|_2^2. \end{aligned}$$
